# Supplementary material for: Expression of Hemangioblast Proteins in von Hippel-Lindau Disease Related Tumors
Source: MDPI journal article supplement (doi:10.3390/cancers15092551), 2023-04-29
Supplement: s1 [file s1]

# Supplementary Materials: Expression of Hemangioblast Proteins in von Hippel-Lindau Disease Related Tumors

Supplementary Table S1: nuclear and cytoplasmic Brachyury staining in VHL hemangioblastomas

| signal intensity                                | 0            | 1           | 2           | 3           |
|-------------------------------------------------|--------------|-------------|-------------|-------------|
| <b>nuclear staining</b>                         |              |             |             |             |
| <b>CEREBELLAR</b>                               | <b>23/26</b> | <b>0/26</b> | <b>0/26</b> | <b>3/26</b> |
| 0% cells                                        | 0            | 0           | 0           | 0           |
| < 10% cells                                     | 0            | 0           | 0           | 3           |
| 10-50% cells                                    | 0            | 0           | 0           | 0           |
| 50-80% cells                                    | 0            | 0           | 0           | 0           |
| > 80% cells                                     | 23           | 0           | 0           | 0           |
| median Remelle score 0, mean Remelle score 0.33 |              |             |             |             |
| <b>SPINAL</b>                                   | <b>11/26</b> | <b>0/21</b> | <b>1/21</b> | <b>9/21</b> |
| 0% cells                                        | 0            | 0           | 0           | 0           |
| < 10% cells                                     | 0            | 0           | 1           | 4           |
| 10-50% cells                                    | 0            | 0           | 0           | 3           |
| 50-80% cells                                    | 0            | 0           | 0           | 1           |
| > 80% cells                                     | 11           | 0           | 0           | 1           |
| median Remelle score 1, mean Remelle score 2.65 |              |             |             |             |
| <b>cytoplasmic staining</b>                     |              |             |             |             |
| <b>CEREBELLAR</b>                               | <b>21/26</b> | <b>4/26</b> | <b>1/26</b> | <b>0/26</b> |
| 0% cells                                        | 0            | 0           | 0           | 0           |
| < 10% cells                                     | 0            | 1           | 0           | 0           |
| 10-50% cells                                    | 0            | 1           | 0           | 0           |
| 50-80% cells                                    | 0            | 2           | 0           | 0           |
| > 80% cells                                     | 21           | 0           | 1           | 0           |
| median Remelle score 0, mean Remelle score 0.63 |              |             |             |             |
| <b>SPINAL</b>                                   | <b>18/21</b> | <b>2/21</b> | <b>1/21</b> | <b>0/21</b> |
| 0% cells                                        | 0            | 0           | 0           | 0           |
| < 10% cells                                     | 0            | 0           | 0           | 0           |
| 10-50% cells                                    | 0            | 1           | 0           | 0           |
| 50-80% cells                                    | 0            | 1           | 1           | 0           |
| > 80% cells                                     | 18           | 0           | 0           | 0           |
| median Remelle score 0, mean Remelle score 0.55 |              |             |             |             |

Supplementary Table S2: nuclear and cytoplasmic TAL1 staining in VHL hemangioblastomas

| signal intensity        | 0           | 1           | 2            | 3            |
|-------------------------|-------------|-------------|--------------|--------------|
| <b>nuclear staining</b> |             |             |              |              |
| <b>CEREBELLAR</b>       | <b>2/26</b> | <b>0/26</b> | <b>12/26</b> | <b>12/26</b> |
| 0% cells                | 0           | 0           | 0            | 0            |
| < 10% cells             | 0           | 0           | 2            | 0            |
| 10-50% cells            | 0           | 0           | 7            | 7            |
| 50-80% cells            | 0           | 0           | 3            | 4            |
| > 80% cells             | 2           | 0           | 0            | 1            |

median Remelle score 6, mean Remelle score 5.08

| <b>SPINAL</b> | <b>2/21</b> | <b>1/21</b> | <b>11/21</b> | <b>7/21</b> |
|---------------|-------------|-------------|--------------|-------------|
| 0% cells      | 0           | 0           | 0            | 0           |
| < 10% cells   | 0           | 1           | 3            | 1           |
| 10-50% cells  | 0           | 0           | 5            | 3           |
| 50-80% cells  | 0           | 0           | 3            | 2           |
| > 80% cells   | 2           | 0           | 0            | 1           |

median Remelle score 4, mean Remelle score 4.67

**cytoplasmic staining**

| <b>CEREBELLAR</b> | <b>5/26</b> | <b>1/26</b> | <b>20/26</b> | <b>0/26</b> |
|-------------------|-------------|-------------|--------------|-------------|
| 0% cells          | 0           | 0           | 0            | 0           |
| < 10% cells       | 0           | 0           | 0            | 0           |
| 10-50% cells      | 0           | 0           | 6            | 0           |
| 50-80% cells      | 0           | 1           | 11           | 0           |
| > 80% cells       | 5           | 0           | 3            | 0           |

median Remelle score 6, mean Remelle score 4.48

| <b>SPINAL</b> | <b>2/21</b> | <b>6/21</b> | <b>13/21</b> | <b>0/21</b> |
|---------------|-------------|-------------|--------------|-------------|
| 0% cells      | 0           | 0           | 0            | 0           |
| < 10% cells   | 0           | 1           | 0            | 0           |
| 10-50% cells  | 0           | 4           | 4            | 0           |
| 50-80% cells  | 0           | 1           | 7            | 0           |
| > 80% cells   | 2           | 0           | 2            | 0           |

median Remelle score 4, mean Remelle score 4.1

**Supplementary Table S3: nuclear and cytoplasmic Brachyury staining in VHL clear cell renal cell carcinomas**

| <b>signal intensity</b> | <b>0</b>     | <b>1</b>    | <b>2</b>    | <b>3</b>    |
|-------------------------|--------------|-------------|-------------|-------------|
| <b>nuclear staining</b> | <b>11/13</b> | <b>1/13</b> | <b>1/13</b> | <b>0/13</b> |
| 0% cells                | 0            | 0           | 0           | 0           |
| < 10% cells             | 0            | 0           | 1           | 0           |
| 10-50% cells            | 0            | 1           | 0           | 0           |
| 50-80% cells            | 0            | 0           | 0           | 0           |
| > 80% cells             | 11           | 0           | 0           | 0           |

median Remelle score 0, mean Remelle score 0.31

| <b>cytoplasmic staining</b> | <b>10/13</b> | <b>3/13</b> | <b>0/13</b> | <b>0/13</b> |
|-----------------------------|--------------|-------------|-------------|-------------|
| 0% cells                    | 0            | 0           | 0           | 0           |
| < 10% cells                 | 0            | 2           | 0           | 0           |
| 10-50% cells                | 0            | 1           | 0           | 0           |
| 50-80% cells                | 0            | 0           | 0           | 0           |
| > 80% cells                 | 10           | 0           | 0           | 0           |

median Remelle score 0, mean Remelle score 0.31

**Supplementary Table S4: nuclear and cytoplasmic TAL1 staining in VHL clear cell renal cell carcinomas**

| <b>signal intensity</b> | <b>0</b>    | <b>1</b>    | <b>2</b>    | <b>3</b>    |
|-------------------------|-------------|-------------|-------------|-------------|
| <b>nuclear staining</b> | <b>1/13</b> | <b>0/13</b> | <b>6/13</b> | <b>6/13</b> |
| 0% cells                | 0           | 0           | 0           | 0           |

|                                                 |              |             |             |             |
|-------------------------------------------------|--------------|-------------|-------------|-------------|
| < 10% cells                                     | 0            | 0           | 4           | 0           |
| 10-50% cells                                    | 0            | 0           | 1           | 2           |
| 50-80% cells                                    | 0            | 0           | 1           | 1           |
| > 80% cells                                     | 1            | 0           | 0           | 3           |
| median Remelle score 2, mean Remelle score 5    |              |             |             |             |
| <b>cytoplasmic staining</b>                     | <b>10/13</b> | <b>3/13</b> | <b>0/13</b> | <b>0/13</b> |
| 0% cells                                        | 0            | 0           | 0           | 0           |
| < 10% cells                                     | 0            | 2           | 0           | 0           |
| 10-50% cells                                    | 0            | 1           | 0           | 0           |
| 50-80% cells                                    | 0            | 0           | 0           | 0           |
| > 80% cells                                     | 10           | 0           | 0           | 0           |
| median Remelle score 2, mean Remelle score 2.75 |              |             |             |             |

Supplementary Table S5: nuclear and cytoplasmic Brachyury staining in VHL pheochromocytomas

|                                              |            |            |            |            |
|----------------------------------------------|------------|------------|------------|------------|
| <b>signal intensity</b>                      | <b>0</b>   | <b>1</b>   | <b>2</b>   | <b>3</b>   |
| <b>nuclear staining</b>                      | <b>8/8</b> | <b>0/8</b> | <b>0/8</b> | <b>0/8</b> |
| 0% cells                                     | 0          | 0          | 0          | 0          |
| < 10% cells                                  | 0          | 0          | 0          | 0          |
| 10-50% cells                                 | 0          | 0          | 0          | 0          |
| 50-80% cells                                 | 0          | 0          | 0          | 0          |
| > 80% cells                                  | 8          | 0          | 0          | 0          |
| median Remelle score 0, mean Remelle score 0 |            |            |            |            |
| <b>cytoplasmic staining</b>                  | <b>5/5</b> | <b>2/8</b> | <b>1/8</b> | <b>0/8</b> |
| 0% cells                                     | 0          | 0          | 0          | 0          |
| < 10% cells                                  | 0          | 0          | 1          | 0          |
| 10-50% cells                                 | 0          | 1          | 0          | 0          |
| 50-80% cells                                 | 0          | 0          | 0          | 0          |
| > 80% cells                                  | 5          | 1          | 0          | 0          |
| median Remelle score 2, mean Remelle score 2 |            |            |            |            |

Supplementary Table S6: nuclear and cytoplasmic TAL1 staining in VHL pheochromocytomas

|                                                 |            |            |            |            |
|-------------------------------------------------|------------|------------|------------|------------|
| <b>signal intensity</b>                         | <b>0</b>   | <b>1</b>   | <b>2</b>   | <b>3</b>   |
| <b>nuclear staining</b>                         | <b>5/8</b> | <b>0/8</b> | <b>2/8</b> | <b>1/8</b> |
| 0% cells                                        | 0          | 0          | 0          | 0          |
| < 10% cells                                     | 0          | 0          | 1          | 1          |
| 10-50% cells                                    | 0          | 0          | 1          | 0          |
| 50-80% cells                                    | 0          | 0          | 0          | 0          |
| > 80% cells                                     | 5          | 0          | 0          | 0          |
| median Remelle score 0, mean Remelle score 0.86 |            |            |            |            |
| <b>cytoplasmic staining</b>                     | <b>1/8</b> | <b>3/8</b> | <b>4/8</b> | <b>0/8</b> |
| 0% cells                                        | 0          | 0          | 0          | 0          |
| < 10% cells                                     | 0          | 2          | 0          | 0          |
| 10-50% cells                                    | 0          | 0          | 2          | 0          |
| 50-80% cells                                    | 0          | 0          | 0          | 0          |
| > 80% cells                                     | 1          | 1          | 2          | 0          |
| median Remelle score 3, mean Remelle score 3.25 |            |            |            |            |

**Supplementary Table S7: nuclear and cytoplasmic Brachyury staining in VHL pancreatic neuroendocrine tumours**

| <b>signal intensity</b>                        | <b>0</b>   | <b>1</b>   | <b>2</b>   | <b>3</b>   |
|------------------------------------------------|------------|------------|------------|------------|
| <b>nuclear staining</b>                        | <b>3/5</b> | <b>0/5</b> | <b>0/5</b> | <b>2/5</b> |
| 0% cells                                       | 0          | 0          | 0          | 0          |
| < 10% cells                                    | 0          | 0          | 0          | 2          |
| 10-50% cells                                   | 0          | 0          | 0          | 0          |
| 50-80% cells                                   | 0          | 0          | 0          | 0          |
| > 80% cells                                    | 0          | 0          | 0          | 0          |
| median Remelle score 0, mean Remelle score 1.2 |            |            |            |            |
| <b>cytoplasmic staining</b>                    | <b>4/5</b> | <b>1/5</b> | <b>0/5</b> | <b>0/5</b> |
| 0% cells                                       | 0          | 0          | 0          | 0          |
| < 10% cells                                    | 0          | 1          | 0          | 0          |
| 10-50% cells                                   | 0          | 0          | 0          | 0          |
| 50-80% cells                                   | 0          | 0          | 0          | 0          |
| > 80% cells                                    | 0          | 0          | 0          | 0          |
| median Remelle score 0, mean Remelle score 0.2 |            |            |            |            |

**Supplementary Table S8: nuclear and cytoplasmic TAL1 staining in VHL pancreatic neuroendocrine tumours**

| <b>signal intensity</b>                        | <b>0</b>   | <b>1</b>   | <b>2</b>   | <b>3</b>   |
|------------------------------------------------|------------|------------|------------|------------|
| <b>nuclear staining</b>                        | <b>2/5</b> | <b>0/5</b> | <b>3/5</b> | <b>0/5</b> |
| 0% cells                                       | 0          | 0          | 0          | 0          |
| < 10% cells                                    | 0          | 0          | 2          | 0          |
| 10-50% cells                                   | 0          | 0          | 1          | 0          |
| 50-80% cells                                   | 0          | 0          | 0          | 0          |
| > 80% cells                                    | 2          | 0          | 0          | 0          |
| median Remelle score 2, mean Remelle score 1.6 |            |            |            |            |
| <b>cytoplasmic staining</b>                    | <b>1/5</b> | <b>3/5</b> | <b>1/5</b> | <b>0/5</b> |
| 0% cells                                       | 0          | 0          | 0          | 0          |
| < 10% cells                                    | 0          | 0          | 0          | 0          |
| 10-50% cells                                   | 0          | 1          | 0          | 0          |
| 50-80% cells                                   | 0          | 0          | 1          | 0          |
| > 80% cells                                    | 1          | 2          | 0          | 0          |
| median Remelle score 4, mean Remelle score 3.2 |            |            |            |            |

**Supplementary Table S9: nuclear and cytoplasmic Brachyury staining in VHL paragangliomas**

| <b>signal intensity</b>                        | <b>0</b>   | <b>1</b>   | <b>2</b>   | <b>3</b>   |
|------------------------------------------------|------------|------------|------------|------------|
| <b>nuclear staining</b>                        | <b>1/2</b> | <b>0/2</b> | <b>0/2</b> | <b>1/2</b> |
| 0% cells                                       | 0          | 0          | 0          | 0          |
| < 10% cells                                    | 0          | 0          | 0          | 1          |
| 10-50% cells                                   | 0          | 0          | 0          | 0          |
| 50-80% cells                                   | 0          | 0          | 0          | 0          |
| > 80% cells                                    | 1          | 0          | 0          | 0          |
| median Remelle score 2, mean Remelle score 1.5 |            |            |            |            |
| <b>cytoplasmic staining</b>                    | <b>1/2</b> | <b>1/2</b> | <b>0/2</b> | <b>0/2</b> |
| 0% cells                                       | 0          | 0          | 0          | 0          |

|              |   |   |   |   |
|--------------|---|---|---|---|
| < 10% cells  | 0 | 1 | 0 | 0 |
| 10-50% cells | 0 | 0 | 0 | 0 |
| 50-80% cells | 0 | 0 | 0 | 0 |
| > 80% cells  | 1 | 0 | 0 | 0 |

median Remelle score 1, mean Remelle score 0.5

**Supplementary Table S10: nuclear and cytoplasmic TAL1 staining in VHL paragangliomas**

|                         |            |            |            |            |
|-------------------------|------------|------------|------------|------------|
| <b>signal intensity</b> | <b>0</b>   | <b>1</b>   | <b>2</b>   | <b>3</b>   |
| <b>nuclear staining</b> | <b>1/2</b> | <b>0/2</b> | <b>0/2</b> | <b>1/2</b> |
| 0% cells                | 0          | 0          | 0          | 0          |
| < 10% cells             | 0          | 0          | 0          | 0          |
| 10-50% cells            | 0          | 0          | 0          | 1          |
| 50-80% cells            | 0          | 0          | 0          | 0          |
| > 80% cells             | 1          | 0          | 0          | 0          |

median Remelle score 3, mean Remelle score 3

|                             |            |            |            |            |
|-----------------------------|------------|------------|------------|------------|
| <b>cytoplasmic staining</b> | <b>0/2</b> | <b>0/2</b> | <b>2/2</b> | <b>0/2</b> |
| 0% cells                    | 0          | 0          | 0          | 0          |
| < 10% cells                 | 0          | 0          | 0          | 0          |
| 10-50% cells                | 0          | 0          | 0          | 0          |
| 50-80% cells                | 0          | 0          | 0          | 0          |
| > 80% cells                 | 0          | 0          | 2          | 0          |

median Remelle score 8, mean Remelle score 8
